# Supplementary material
Source: PubMed Central journal article supplement (PMC9208583)
Supplement: boe-13-6-3461-s001.pdf [file boe-13-6-3461-s001.pdf]

## Hyperspectral evaluation of vasculature in induced peritonitis mouse models: supplement

JOŠT STERGAR,<sup>1,2,\*</sup>  KATJA LAKOTA,<sup>3,4</sup> MARTINA PERŠE,<sup>5</sup>   
MATIJA TOMŠIČ,<sup>4,5</sup> AND MATIJA MILANIČ<sup>1,2</sup>

<sup>1</sup>*J. Stefan Institute, Jamova cesta 39, 1000 Ljubljana, Slovenia*

<sup>2</sup>*Faculty of Mathematics and Physics, University of Ljubljana, Jadranska ulica 19, 1000 Ljubljana, Slovenia*

<sup>3</sup>*FAMNIT, University of Primorska, Glagoljaska 8, 6000 Koper, Slovenia*

<sup>4</sup>*University Medical Centre, Department of Rheumatology, Vodnikova ulica 62, 1000 Ljubljana, Slovenia*

<sup>5</sup>*Faculty of Medicine, University of Ljubljana, Vrazov trg 2, 1000 Ljubljana, Slovenia*

\*[jost.stergar@ijs.si](mailto:jost.stergar@ijs.si)

---

This supplement published with Optica Publishing Group on 18 May 2022 by The Authors under the terms of the [Creative Commons Attribution 4.0 License](https://creativecommons.org/licenses/by/4.0/) in the format provided by the authors and unedited. Further distribution of this work must maintain attribution to the author(s) and the published article's title, journal citation, and DOI.

Supplement DOI: <https://doi.org/10.6084/m9.figshare.19733569>

Parent Article DOI: <https://doi.org/10.1364/BOE.460288>

# Hyperspectral evaluation of vasculature in induced peritonitis mouse models: supplemental document

This is a supplemental document to the *Hyperspectral evaluation of vasculature in induced peritonitis mouse models* article, containing additional plots that show per-subject values of metrics included in the main document.

## 1. PER-SUBJECT VALUES OF RAF METRIC

Plots in Figure S1 show per-subject bar charts of relative abnormal fraction metric for the whole experimental population, color coded to different groups, including control groups (PBS & PBS+RVD) and model groups (CHX & CHX+RVD).

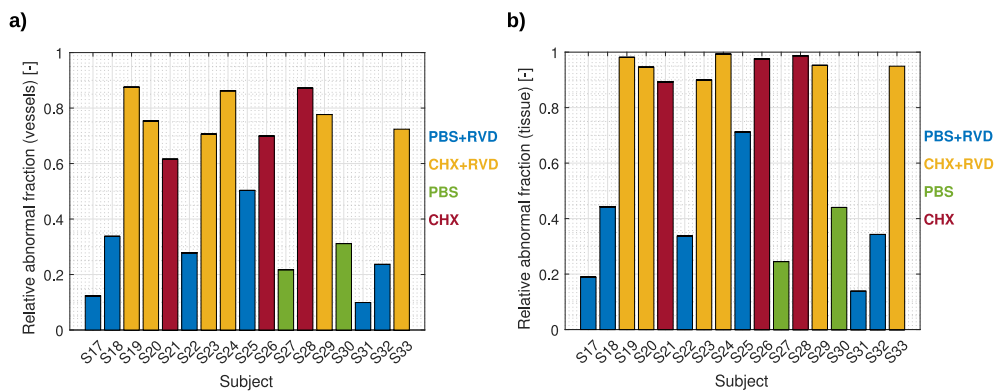

**Fig. S1.** Bar chart of relative abnormal fraction for vessels (a) and surrounding tissue (b). Different experimental groups are denoted by different colors.

## 2. PER-SUBJECT OXYGENATION HISTOGRAMS

In the main paper, average  $SpO_2$  histograms are presented for clarity. In Figure S2, histograms for all the subjects in the four experimental groups are shown.

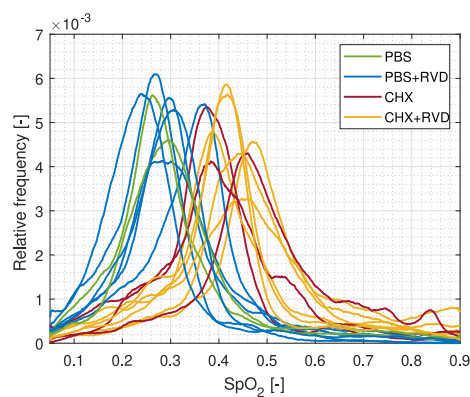

**Fig. S2.** Example histograms for blood vessel oxygenation of a healthy and diseased subjects, showing marked differences.
